# Supplementary material for: Mutations of PIK3CA in gastric adenocarcinoma
Source: BMC Cancer. 2005 Mar 23;5:29. doi: 10.1186/1471-2407-5-29 (PMC1079799; doi:10.1186/1471-2407-5-29)
Supplement: Additional File 1 — Primers and PCR conditions used for PIK3CA sequencing. Conditions for PCR and sequences of primers used in PIK3CA sequencing [file 1471-2407-5-29-S1.xls]

## Sheet: PIK3CA primers
External PCR amplification primers
Exon	Forward primers (5' to 3')	Reverse primers (5' to 3')	Expected product size (bp)	Annealing Temperature (°C)	Magnesium concentration (mM)
Exon 9	TTGCTTTTTCTGTAAATCATCTGTG	CTGCTTTATTTATTCCAATAGGTATG	321	58	1
Exon 18	TCCTTATTCGTTGTCAGTGATTG	CAGCTTTCAAAAATAAGAAATTATG	348	58	3
Exon 20	TGACATTTGAGCAAAGACCTG	CATAACATGAAATTGCGCATT	588	55	2
Internal sequencing primers
Exon	Strand sequenced	Primer sequence (5' to 3')
Exon 9	Forward	GAGGGGAAAAATATGACAAAGA
Exon 18	Forward	GGCCTGAATCACTATATTTCCAT
Exon 18	Reverse	AACACCAAAACATTTTAAACAGAGA
Exon 20	Forward	ACATCATTTGCTCCAAACTGA
Exon 20	Reverse	CCTATGCAATCGGTCTTTGC
Primers in blue are newly designed in this study based on PIK3CA sequence obtained from NCBI (accession number NM_006218).
Primers in black are original primers used by Samuel et al. [13]
